# Supplementary material
Source: PubMed Central journal article supplement (PMC4100481)
Supplement: NIHMS601732-supplement-01.pdf [file NIHMS601732-supplement-01.pdf]

## SUPPLEMENTARY ONLINE DATA

# Functional divergence between the two P1–P2 stalk dimers on the ribosome in their interaction with ricin A chain

Przemysław GRELA\*<sup>†1</sup>, Xiao-Ping LI\*, Marek TCHÓRZEWSKI<sup>†2</sup> and Nilgun E. TUMER\*<sup>2</sup>

\*Department of Plant Biology and Pathology, School of Environmental and Biological Sciences, Rutgers University, New Brunswick, New Jersey 08901-8520, U.S.A.

<sup>†</sup>Department of Molecular Biology, Maria Curie-Skłodowska University, Akademicka 19, 20-033 Lublin, Poland

## MATERIALS AND METHODS

### Cytotoxicity of RTA in yeast mutants

Yeast cells harbouring pre-RTA vector (NT849) were grown in liquid SD medium with 2% glucose. The cells were collected by centrifugation and then resuspended in liquid SD medium containing 2% galactose to a  $D_{600}$  value of 0.3 to induce pre-RTA expression. At different time points after induction, 50  $\mu$ l of cells were sampled and normalized to a  $D_{600}$  value of 0.1. Four serial dilutions (1:10) were made and 15  $\mu$ l of each dilution were spotted on to SD-Leu plates containing 2% glucose.

### Live cell imaging

Visualization of RTA was carried out using P0 yeast mutants harbouring pre-RTA–EGFP [1] at 6 and 12 hpi of galactose. Yeast cells were directly added to 2% agar pads on glass slides and visualized using an Olympus BX41 epifluorescence microscope equipped with a CCD camera (Hamamatsu) and 100 $\times$  oil objective (1.45 NAPlan Apo, Olympus). Image acquisition and processing were performed using Metamorph Image Software 7.0 (MDS Analytical Technologies) as described previously [1].

<sup>1</sup> Present address: Department of Molecular Biology, Marie Curie-Skłodowska University, Akademicka 19, 20-033, Lublin, Poland.

<sup>2</sup> Correspondence may be addressed to either of these authors (email maro@hektor.umcs.lublin.pl or tumer@aesop.rutgers.edu).

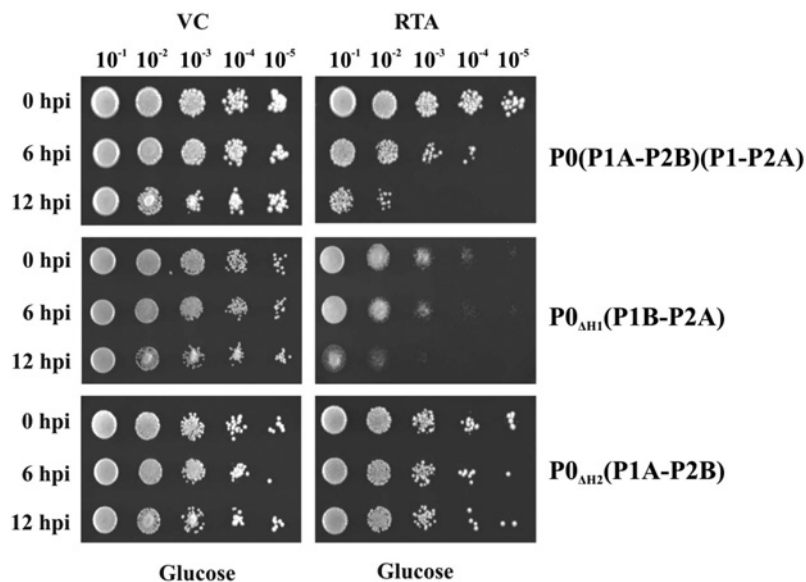

**Figure S1 Viability of yeast stalk mutants expressing RTA**

Yeast cells transformed with a plasmid carrying the gene encoding pre-RTA under the *GAL1* promoter were transferred from SD medium supplemented with 2% glucose into SD medium with 2% galactose to induce expression of RTA. Equal numbers of cells were spotted on to a plate containing 2% glucose after 0, 6 and 12 hpi and grown at 30°C for 3 days. Cells carrying the VC (empty vector) were used as controls.

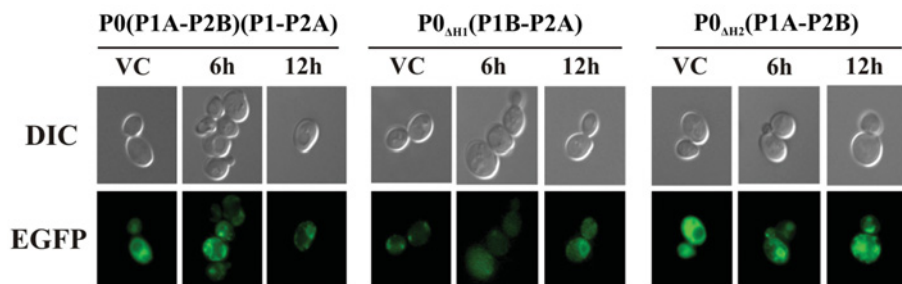

**Figure S2 RTA expression in the yeast stalk mutants monitored by epifluorescence microscopy**

Yeast cells were grown in SD medium with 2% glucose and induced with 2% galactose. The images were taken at 6 and 12 hpi with an Olympus BX41 fluorescence microscope. Cells transformed with the VC (empty vector expressing GFP) were used as controls. DIC, differential interference contrast.

## REFERENCE

- 1 Yan, Q., Li, X. P. and Tumer, N. E. (2012) N-glycosylation does not affect the catalytic activity of ricin A chain but stimulates cytotoxicity by promoting its transport out of the endoplasmic reticulum. *Traffic* **13**, 1508–1521

Received 2 January 2014/24 February 2014; accepted 28 February 2014  
Published as BJ Immediate Publication 28 February 2014, doi:10.1042/BJ20140014
